# Supplementary material for: Methods for the involvement of people living with dementia in research focused on the built environment: a protocol for a scoping review
Source: HighWire-hosted journal article supplement (doi:10.1136/bmjopen-2023-075350), 2023-08-01
Supplement: bmjopen-2023-075350supp001_data_supplement.pdf [file bmjopen-2023-075350supp001_data_supplement.pdf]

## Supplementary Material – Protocol SR-MethoDe-BE

Supplementary table 1. Search for MEDLINE via PubMed

| Search No. | Terms/Keywords                            |
|------------|-------------------------------------------|
| #1         | Dementia[Title/Abstract]                  |
| #2         | Alzheimer*[Title/Abstract]                |
| #3         | "Pick disease"[Title/Abstract:~0]         |
| #4         | "Lewy body"[Title/Abstract:~0]            |
| #5         | Dementia[MeSH Terms]                      |
| #6         | <b>#1-#5/OR</b>                           |
| #7         | "Physical environment"[Title/Abstract:~0] |
| #8         | "Built environment"[Title/Abstract:~0]    |
| #9         | Environment design[MeSH Terms]            |
| #10        | Safety[MeSH Terms]                        |
| #11        | Small?size[Title/Abstract]                |
| #12        | "Wayfind*[Title/Abstract]                 |
| #13        | "Spatial layout"[Title/Abstract]          |
| #14        | "Familiar*[Title/Abstract]                |
| #15        | accessibility, architectural[MeSH Terms]  |
| #16        | orientation, spatial[MeSH Terms]          |
| #17        | social interaction[MeSH Terms]            |
| #18        | community integration[MeSH Terms]         |
| #19        | social engagement[MeSH Terms]             |
| #20        | Home?like[Title/Abstract]                 |
| #21        | outdoor[Title/Abstract]                   |
| #22        | quiet room[Title/Abstract]                |
| #23        | floor[Title/Abstract]                     |
| #24        | dining room[Title/Abstract]               |

## Supplementary Material – Protocol SR-MethoDe-BE

|            |                                                        |
|------------|--------------------------------------------------------|
| #25        | kitchen[Title/Abstract]                                |
| #26        | furnish*[Title/Abstract]                               |
| #27        | Large scale[Title/Abstract]                            |
| #28        | home environment[MeSH Terms]                           |
| #29        | gardens[MeSH Terms]                                    |
| #30        | personal space[MeSH Terms]                             |
| #31        | light[MeSH Terms]                                      |
| #32        | paint[MeSH Terms]                                      |
| #33        | color[MeSH Terms]                                      |
| <b>#34</b> | <b>#7-#33/OR</b>                                       |
| <b>#35</b> | <b>#6 AND #34</b>                                      |
| <b>#36</b> | <i>Filter applied: Period of publication: 10 years</i> |

## Supplementary table 2. Search for CINAHL via Ebsco

| Search No. | Terms/Keywords                      |
|------------|-------------------------------------|
| #1         | AB dementia                         |
| #2         | AB alzheimer*                       |
| #3         | AB pick W1 diseas*                  |
| #4         | AB lewy W1 body                     |
| #5         | MH dementia                         |
| <b>#6</b>  | <b>#1-#5/OR</b>                     |
| #7         | AB physical W1 environment          |
| #8         | built W1 environment                |
| #9         | MH built environment                |
| #10        | MH facility design and construction |
| #11        | MH safety                           |

## Supplementary Material – Protocol SR-MethoDe-BE

|            |                                                                     |
|------------|---------------------------------------------------------------------|
| #12        | AB small-size or AB small W1 size                                   |
| #13        | AB orientation                                                      |
| #14        | AB wayfind*                                                         |
| #15        | AB familiar*                                                        |
| #16        | AB interaction W1 space                                             |
| #17        | MH sensory stimulation                                              |
| #18        | AB engagement                                                       |
| #19        | MH architectural accessibility                                      |
| #20        | MH cognitive orientation                                            |
| #21        | MJ nursing home design                                              |
| #22        | MJ interior design                                                  |
| #23        | AB color                                                            |
| #24        | AB paint                                                            |
| #25        | AB light                                                            |
| #26        | AB architecture                                                     |
| #27        | AB kitchen                                                          |
| #28        | AB room                                                             |
| #29        | AB floor                                                            |
| #30        | AB home-like OR AB homelike                                         |
| #31        | AB garden*                                                          |
| #32        | <b>#6 AND #32</b>                                                   |
| <b>#33</b> | <b>#42 NOT #43</b><br>Limiters - Published Date: 20130101-20231231; |

## Supplementary Material – Protocol SR-MethoDe-BE

Supplementary table 3. Search for APA PsycInfo via EBSCO

| Search No. | Terms/Keywords                      |
|------------|-------------------------------------|
| #1         | AB dementia                         |
| #2         | AB alzheimer*                       |
| #3         | AB pick W1 diseases*                |
| #4         | AB lewy W1 body                     |
| #5         | MH dementia                         |
| #6         | <b>#1-#5/OR</b>                     |
| #7         | AB physical W1 environment          |
| #8         | AB built W1 environment             |
| #9         | MH built environment                |
| #10        | MH facility design and construction |
| #11        | MH safety                           |
| #12        | AB small-size or AB small W1 size   |
| #13        | AB orientation                      |
| #14        | AB wayfind*                         |
| #15        | AB familiar*                        |
| #16        | AB interaction W1 space             |
| #17        | MH sensory stimulation              |
| #18        | AB engagement                       |
| #19        | MH architectural accessibility      |
| #20        | MH cognitive orientation            |
| #21        | MJ nursing home design              |
| #22        | MJ interior design                  |
| #23        | AB color                            |
| #24        | AB paint                            |

## Supplementary Material – Protocol SR-MethoDe-BE

|     |                                       |
|-----|---------------------------------------|
| #25 | AB light                              |
| #26 | AB architecture                       |
| #27 | AB kitchen                            |
| #28 | AB room                               |
| #29 | AB floor                              |
| #30 | AB home-like or AB homelike           |
| #31 | AB garden*                            |
| #32 | <b>#7-#31/OR</b>                      |
| #33 | <b>#6 AND #32</b>                     |
| #34 | Limiters: Publication Year: 2013-2023 |

## Supplementary table 4. Search for Scopus

| Search No. | Terms/Keywords                                         |
|------------|--------------------------------------------------------|
| #1         | TITLE-ABS-KEY (dementia)                               |
| #2         | TITLE-ABS-KEY (alzheimer*)                             |
| #3         | TITLE-ABS-KEY (pick W/0 diseas*)                       |
| #4         | TITLE-ABS-KEY (lewy W/0 body)                          |
| #5         | <b>#1-#4/OR</b>                                        |
| #6         | TITLE-ABS-KEY (built W/0 environment )                 |
| #7         | TITLE-ABS-KEY (physical W/0 environment )              |
| #8         | TITLE-ABS-KEY (environment* W/5 design )               |
| #9         | <b>#6-#8/OR</b>                                        |
| #10        | <b>#5 AND ##9</b>                                      |
| #11        | <b>Limits: PUBYEAR &gt; 2012 AND PUBYEAR &lt; 2024</b> |

## Supplementary Material – Protocol SR-MethoDe-BE

## Supplementary table 5. Search for Google Scholar

| Search No. | Terms/Keywords                                 |
|------------|------------------------------------------------|
| #1         | dementia AND built environment AND involvement |
| #2         | dementia AND built environment AND project     |
| #3         | dementia AND built environment AND research    |
